# Supplementary material
Source: publisher site journal article supplement (https://www.spandidos-publications.com/8667/downloadSupplementary)
Supplement: Supplementary file 1 [file downloadSupplementary]

Table SI. Reported cases of breast cancer with synchronous metastasis to the uterine cervix.

| First author/s, year | Age, years | Menstrual status | Histological type | ER | PR | HER-2 | Lymph node metastasis (A/B) | Treatment (P)    | P/M Interval, months | Clinical presentation              | Hysteroscopy | Cervical cytology | Cervical biopsy | Histological type (M) | Diagnostic methods | Treatment (M)    | M   | Survival time, months | (Ref.) |
|----------------------|------------|------------------|-------------------|----|----|-------|-----------------------------|------------------|----------------------|------------------------------------|--------------|-------------------|-----------------|-----------------------|--------------------|------------------|-----|-----------------------|--------|
| Song, 1963           | 45         | Pre              | NR                | NR | NR | NR    | +(8/32)                     | Surgey           | Gyn                  | AVB<br>AVD<br>Abdominal discomfort | Sclerosis    | +                 | NR              | NR                    | NR                 | RT               | FGT | 6+                    | (11)   |
| Song, 1963           | 49         | Pre              | IDC               | NR | NR | NR    | +                           | Refuse treatment | Gyn                  | AVB                                | Sclerosis    | -                 | +               | IDC                   | NR                 | Refuse treatment | N   | 4                     | (11)   |
| Song, 1963           | 51         | Pre              | NR                | NR | NR | NR    | NR                          | Surgey + RT      | 48                   | AVB                                | Sclerosis    | +                 | +               | NR                    | NR                 | Refuse treatment | Yes | 4                     | (11)   |

|                        |    |      |                |    |    |    |         |                      |                              |         |                        |    |    |    |                             |             |     |     |      |
|------------------------|----|------|----------------|----|----|----|---------|----------------------|------------------------------|---------|------------------------|----|----|----|-----------------------------|-------------|-----|-----|------|
|                        |    |      |                |    |    |    |         |                      |                              |         |                        |    |    |    |                             | ment        |     |     |      |
| Cohan and Kaplan, 1984 | 74 | Post | IDC            | +  | NR | NR | +(1/10) | Surge<br>ry +<br>RT  | 12                           | AVB     | Stenosis               | No | No | NR | No                          | Surge<br>ry | Yes | 11+ | (12) |
| Yazigi et al, 1988     | 38 | Pre  | IDC            | NR | NR | NR | NR      | NR                   | 0                            | NR      | Firm<br>and<br>friable | -  | +  | NR | NR                          | Surge<br>ry | Yes | 16  | (13) |
| Yazigi et al, 1988     | 49 | NR   | L:IDC<br>R:ILC | NR | NR | NR | NR      | Surge<br>ry +<br>RT  | Gyn<br>sympt<br>oms<br>first | No      | Erosion                | NR | +  | NR | NR                          | Surge<br>ry | Yes | 14  | (13) |
| Yazigi et al, 1988     | 46 | NR   | L:IDC<br>R:IDC | NR | NR | NR | +(2/9)  | Surge<br>ry +<br>RT  | 42                           | AVB     | No                     | NR | +  | NR | NR                          | No          | Yes | 2   | (13) |
| Mallow et al, 1997     | 42 | Pre  | ILC            | +  | +  | NR | +(7/11) | Surge<br>ry +<br>CT  | 36                           | Ascites | NR                     | +  | +  | NR | No                          | Surge<br>ry | Yes | 36  | (14) |
| Kennebec and Alagoz,   | 71 | Post | IDC            | -  | -  | -  | +(1/12) | Surge<br>ry +<br>TAM | 24                           | No      | Cervical<br>mass       | NR | +  | NR | Pelvic<br>CT<br>shows<br>no | RT          | No  | NR  | (15) |

|                                  |    |      |     |   |    |   |   |                                      |                              |                                        |                  |    |    |       |                                                             |                     |             |     |      |
|----------------------------------|----|------|-----|---|----|---|---|--------------------------------------|------------------------------|----------------------------------------|------------------|----|----|-------|-------------------------------------------------------------|---------------------|-------------|-----|------|
| 1998                             |    |      |     |   |    |   |   |                                      |                              |                                        |                  |    |    |       | cervical<br>abnorm<br>ality.                                |                     |             |     |      |
| Piura<br><i>et al</i> ,<br>1999  | 58 | Post | IDC | + | -  | - | + | Surge<br>ry +<br>RT +<br>CT +<br>TAM | 36                           | AVB                                    | NR               | No | No | HR(+) | Pelvic<br>CT<br>shows<br>no<br>cervical<br>abnorm<br>ality. | Surge<br>ry +<br>RT | F<br>G<br>T | NR  | (16) |
| Bryson<br><i>et al</i> ,<br>1999 | 47 | Post | IDC | + | NR | - | - | Surge<br>ry +<br>TAM                 | 17                           | No                                     | Sclerosis        | +  | +  | NR    | Pelvic<br>CT<br>shows<br>no<br>cervical<br>abnorm<br>ality. | Surge<br>ry +<br>RT | N<br>o      | 48+ | (2)  |
| Hepp<br><i>et al</i> ,<br>1999   | 55 | Pre  | ILC | + | -  | - | + | Surge<br>ry +<br>CT                  | Gyn<br>sympt<br>oms<br>first | AVB<br>Abdom<br>inal<br>discom<br>fort | Cervical<br>mass | NR | +  | ILC   | Pelvic<br>CT<br>shows<br>cervical<br>abnorm                 | Surge<br>ry         | Yes         | NR  | (5)  |

|                                                     |    |    |            |   |        |   |    |                                              |                              |                                            |                  |    |    |              |                                                       |             |         |    |      |
|-----------------------------------------------------|----|----|------------|---|--------|---|----|----------------------------------------------|------------------------------|--------------------------------------------|------------------|----|----|--------------|-------------------------------------------------------|-------------|---------|----|------|
|                                                     |    |    |            |   |        |   |    |                                              |                              |                                            |                  |    |    |              | ality.                                                |             |         |    |      |
| Pam<br>bucci<br>an <i>et</i><br><i>al</i> ,<br>2000 | 50 | NR | ILC        | + | +      | + | NR | Surge<br>ry                                  | Gyn<br>sympt<br>oms<br>first | Abdom<br>inal<br>discom<br>fort<br>ascites | No               | +  | NR | ILC<br>HR(+) | Pelvic<br>CT<br>shows<br>cervical<br>abnorm<br>ality. | Surge<br>ry | Y<br>es | NR | (17) |
| Paue<br>r <i>et</i><br><i>al</i> ,<br>2003          | 40 | NR | IDC        | + | +      | - | -  | Surge<br>ry +<br>RT +<br>CT                  | 28                           | No                                         | Cervical<br>mass | NR | +  | HR(+)        | No                                                    | No          | Y<br>es | 9  | (18) |
| Ogin<br>o <i>et</i><br><i>al</i> ,<br>2003          | 49 | NR | ILC        | - | +      | - | -  | Surge<br>ry +<br>RT +<br>CT +<br>ET +<br>TAM | 128                          | AVB                                        | Cervical<br>mass | +  | +  | HR(+)        | Pelvic<br>CT<br>shows<br>cervical<br>abnorm<br>ality. | Surge<br>ry | Y<br>es | 8  | (19) |
| Leho<br>czky<br><i>et al</i> ,<br>2003              | 52 | NR | ILC<br>IDC | + | N<br>R | - | -  | Surge<br>ry                                  | 48                           | AVB<br>Abdom<br>inal<br>discom<br>fort     | NR               | NR | +  | HR(+)        | NR                                                    | NR          | Y<br>es | 16 | (20) |

|                                            |    |      |     |        |        |    |    |                                      |                     |                                 |                  |    |   |     |    |                             |             |                                                 |      |
|--------------------------------------------|----|------|-----|--------|--------|----|----|--------------------------------------|---------------------|---------------------------------|------------------|----|---|-----|----|-----------------------------|-------------|-------------------------------------------------|------|
| Rau<br><i>et al</i> ,<br>2003              | 55 | Post | ILC | N<br>R | N<br>R | NR | +  | Surge<br>ry +<br>RT +<br>CT +<br>TAM | 48                  | Abdom<br>inal<br>discom<br>fort | Cervical<br>mass | +  | + | NR  | No | Refus<br>e<br>treat<br>ment | N<br>R      | NR                                              | (21) |
| Gree<br>n <i>et</i><br><i>al</i> ,<br>2004 | 43 | NR   | IDC | N<br>R | N<br>R | NR | NR | Surge<br>ry +<br>RT +<br>CT          | 3                   | AVB                             | No               | +  | + | IDC | No | Surge<br>ry                 | F<br>G<br>T | 21+                                             | (22) |
| Fam<br>oriyo<br><i>et al</i> ,<br>2004     | 78 | Post | NR  | N<br>R | N<br>R | NR | NR | TAM                                  | NR                  | AVB                             | Cervical<br>mass | NR | + | ILC | No | No                          | N<br>R      | NR                                              | (23) |
| Gree<br>n <i>et</i><br><i>al</i> ,<br>2005 | 43 | NR   | IDC | N<br>R | N<br>R | NR | NR | NR                                   | NR                  | AVB                             | NR               | NR | + | NR  | No | Surge<br>ry                 | N<br>o      | Aliv<br>e at<br>the<br>time<br>of<br>repo<br>rt | (24) |
| Haji<br><i>et al</i> ,<br>2005             | 50 | Post | ILC | N<br>R | N<br>R | NR | NR | NR                                   | Gyn<br>sympt<br>oms | AVB                             | Sclerosi<br>s    | +  | + | ILC | No | No                          | Y<br>es     | NR                                              | (25) |

|                                                 |    |      |            |   |        |    |    |                                      |       |                  |                  |    |    |              |                                                             |             |             |      |      |
|-------------------------------------------------|----|------|------------|---|--------|----|----|--------------------------------------|-------|------------------|------------------|----|----|--------------|-------------------------------------------------------------|-------------|-------------|------|------|
|                                                 |    |      |            |   |        |    |    |                                      | first |                  |                  |    |    |              |                                                             |             |             |      |      |
| Lee<br><i>et al</i> ,<br>2005                   | 78 | Post | ILC        | + | N<br>R | NR | +  | Surge<br>ry +<br>RT +<br>CT +<br>TAM | 21    | No<br>CA153<br>↑ | No               | +  | +  | ILC          | Pelvic<br>CT<br>shows<br>no<br>cervical<br>abnorm<br>ality. | Surge<br>ry | F<br>G<br>T | NR   | (26) |
| Agra<br>wal<br><i>et</i><br><i>al</i> ,20<br>06 | 51 | NR   | ILC        | + | N<br>R | NR | +  | Surge<br>ry +<br>CT +<br>TAM         | 48    | No               | NR               | +  | +  | ILC<br>HR(+) | No                                                          | No          | N<br>o      | NR   | (27) |
| Erka<br>nli <i>et</i><br><i>al</i> ,<br>2006    | 63 | Post | ILC<br>IDC | + | +      | +  | +  | Surge<br>ry +<br>RT +<br>ET          | 6     | No<br>CA153<br>↑ | NR               | NR | NR | ILC<br>HR(+) | NR                                                          | Surge<br>ry | F<br>G<br>T | 0.5+ | (28) |
| Mou<br>savi<br><i>et al</i> ,<br>2007           | 56 | Post | IDC        | + | N<br>R | -  | NR | Surge<br>ry +<br>RT +<br>CT +<br>ET  | 60    | AVB              | Cervical<br>mass | +  | +  | HR(+)        | No                                                          | Surge<br>ry | N<br>o      | 24+  | (7)  |

|                                 |    |      |     |   |   |   |   |                                      |     |                          |                             |    |    |              |                                                           |             |             |      |      |
|---------------------------------|----|------|-----|---|---|---|---|--------------------------------------|-----|--------------------------|-----------------------------|----|----|--------------|-----------------------------------------------------------|-------------|-------------|------|------|
| Perisic <i>et al</i> , 2007     | 65 | Post | ILC | + | + | - | + | Surge<br>ry +<br>RT +<br>CT +<br>TAM | 52  | No                       | NR                          | NR | +  | NR           | NR                                                        | Surge<br>ry | N<br>o      | 20   | (29) |
| Manici <i>et al</i> , 2008      | 41 | NR   | ILC | + | + | - | - | Surge<br>ry +<br>ET                  | 132 | No<br>CA153<br>↑<br>TPA↑ | Cervical<br>mass            | -  | +  | ILC<br>HR(+) | PET-C<br>T<br>shows<br>no<br>cervical<br>abnorm<br>ality. | Surge<br>ry | N<br>o      | 20+  | (30) |
| Ustaalioglu <i>et al</i> , 2009 | 56 | Post | ILC | + | + | - | + | Surge<br>ry +<br>RT +<br>CT +<br>ET  | 36  | AVB                      | NR                          | -  | NR | HR(+)        | No                                                        | Surge<br>ry | F<br>G<br>T | 9+   | (31) |
| Bogliolo <i>et al</i> , 2010    | 78 | Post | ILC | + | + | - | + | Surge<br>ry +<br>RT +<br>CT +<br>ET  | 0   | No                       | Cervical<br>enlarge<br>ment | -  | +  | HR(+)        | Pelvic<br>CT<br>shows<br>cervical<br>abnorm               | No          | N<br>o      | ^ 30 | (32) |

|                                                     |    |      |                |        |        |    |    |                     |                              |                                                    |                  |    |    |              |                                                       |             |         |    |      |
|-----------------------------------------------------|----|------|----------------|--------|--------|----|----|---------------------|------------------------------|----------------------------------------------------|------------------|----|----|--------------|-------------------------------------------------------|-------------|---------|----|------|
|                                                     |    |      |                |        |        |    |    |                     |                              |                                                    |                  |    |    |              | ality.                                                |             |         |    |      |
| D'So<br>uza<br><i>et al</i> ,<br>2010               | 44 | NR   | ILC            | N<br>R | N<br>R | NR | NR | NR                  | Gyn<br>sympt<br>oms<br>first | AVB                                                | Sclerosi<br>s    | +  | +  | ILC          | PET-C<br>T<br>shows<br>cervical<br>abnorm<br>ality.   | NR          | Y<br>es | NR | (33) |
| Hori<br>kawa<br><i>et al</i> ,<br>2012              | 52 | NR   | ILC            | +      | +      | -  | +  | Surge<br>ry +<br>ET | Gyn<br>sympt<br>oms<br>first | Abdom<br>inal<br>discom<br>fort<br>Pollaki<br>uria | Cervical<br>mass | -  | NR | ILC<br>HR(+) | Pelvic<br>CT<br>shows<br>cervical<br>abnorm<br>ality. | Surge<br>ry | N<br>o  | NR | (34) |
| Benk<br>errou<br>m <i>et</i><br><i>al</i> ,20<br>14 | 48 | Pre  | L:IDC<br>R:ILC | +      | +      | +  | NR | CT                  | Gyn<br>sympt<br>oms<br>first | AVB                                                | Cervical<br>mass | NR | +  | ILC<br>HR(+) | Pelvic<br>CT<br>shows<br>cervical<br>abnorm<br>ality. | Surge<br>ry | Y<br>es | 27 | (35) |
| Wak<br>s <i>et</i><br><i>al</i> ,                   | 53 | Post | ILC            | +      | +      | -  | +  | Surge<br>ry +       | 180                          | AVB                                                | Cervical<br>mass | NR | +  | HR(+)        | PET-C<br>T                                            | No          | Y<br>es | NR | (36) |

|                                                    |    |     |     |   |   |   |          |                                      |                              |                                 |                             |    |    |              |                                                             |             |             |    |      |
|----------------------------------------------------|----|-----|-----|---|---|---|----------|--------------------------------------|------------------------------|---------------------------------|-----------------------------|----|----|--------------|-------------------------------------------------------------|-------------|-------------|----|------|
| 2015                                               |    |     |     |   |   |   |          | RT +<br>CT                           |                              |                                 |                             |    |    |              | shows<br>cervical<br>abnorm<br>ality.                       |             |             |    |      |
| Loka<br>dasa<br>n <i>et</i><br><i>al</i> ,<br>2015 | 49 | Pre | ILC | + | + | - | +        | CT +<br>ET                           | Gyn<br>sympt<br>oms<br>first | AVB                             | Cervical<br>enlarge<br>ment | NR | NR | ILC          | No                                                          | Surge<br>ry | F<br>G<br>T | NR | (3)  |
| Loka<br>dasa<br>n <i>et</i><br><i>al</i> ,<br>2015 | 49 | NR  | ILC | + | + | - | +(11/16) | Surge<br>ry +<br>RT +<br>CT +<br>TAM | 48                           | Abdom<br>inal<br>discom<br>fort | Cervical<br>mass            | NR | +  | HR(+)<br>ILC | Pelvic<br>CT<br>shows<br>no<br>cervical<br>abnorm<br>ality. | No          | F<br>G<br>T | NR | (3)  |
| Proe<br>nça<br><i>et al</i> ,<br>2016              | 58 | NR  | IDC | + | + | - | +        | NT+<br>Surge<br>ry +<br>RT +<br>TAM  | 24                           | No                              | Cervical<br>enlarge<br>ment | +  | +  | HR(+)        | Pelvic<br>MRI<br>shows<br>cervical<br>abnorm<br>ality.      | No          | N<br>o      | 9  | (37) |

|                             |    |      |            |    |    |    |    |                                       |     |               |               |    |    |                     |                                        |             |             |      |      |
|-----------------------------|----|------|------------|----|----|----|----|---------------------------------------|-----|---------------|---------------|----|----|---------------------|----------------------------------------|-------------|-------------|------|------|
| Proença <i>et al</i> , 2016 | 77 | Post | ILC        | +  | +  | -  | NR | RT +<br>CT +<br>ET                    | 36  | No            | Sclerosis     | +  | +  | NR                  | NR                                     | No          | Yes         | 6    | (37) |
| Parilla <i>et al</i> , 2017 | 68 | Post | ILC        | NR | NR | NR | NR | NR                                    | 36  | AVB           | Sclerosis     | NR | +  | HR(+)               | Pelvic MRI shows cervical abnormality. | No          | Yes         | NR   | (38) |
| Raziana <i>et al</i> , 2017 | 58 | Post | ILC<br>IDC | NR | NR | +  | NR | Surge<br>ry +<br>RT +<br>CT +<br>ET   | 108 | AVB           | Cervical mass | -  | NR | ILC<br>HER-2<br>(+) | PET-CT shows no cervical abnormality.  | Surge<br>ry | F<br>G<br>T | 24+  | (39) |
| Seo <i>et al</i> , 2017     | 46 | NR   | ILC        | +  | +  | +  | -  | NT +<br>Surge<br>ry +<br>RT +<br>CT + | 24  | AVB<br>Anemia | Cervical mass | NR | NR | HR(+)               | Pelvic ultrasound shows cervical       | Surge<br>ry | F<br>G<br>T | 0.5+ | (40) |

|                               |    |      |     |   |    |   |   |                             |    |               |                  |    |    |              |                                                                           |    |             |    |      |
|-------------------------------|----|------|-----|---|----|---|---|-----------------------------|----|---------------|------------------|----|----|--------------|---------------------------------------------------------------------------|----|-------------|----|------|
|                               |    |      |     |   |    |   |   | ET                          |    |               |                  |    |    |              | abnorm<br>ality.                                                          |    |             |    |      |
| Akhtar <i>et al</i> , 2017    | 62 | Post | ILC | + | +  | + | + | Refuse<br>treatm<br>ent     | 0  | No            | No               | +  | No | HR(+)        | Pelvic<br>CT<br>shows<br>no<br>cervical<br>abnorm<br>ality.               | No | F<br>G<br>T | NR | (41) |
| Thouvenot <i>et al</i> , 2018 | 84 | Post | IDC | + | NR | - | - | Surge<br>ry +<br>ET         | 24 | AVB<br>Anemia | NR               | NR | +  | TNBC         | Pelvic<br>CT and<br>PET-C<br>T show<br>no<br>cervical<br>abnorm<br>ality. | No | Yes         | 7  | (42) |
| Abdalla <i>et al</i> , 2018   | 32 | NR   | IDC | - | -  | + | + | Surge<br>ry +<br>RT +<br>CT | NR | AVB           | Cervical<br>mass | NR | +  | HER-2<br>(+) | Pelvic<br>CT<br>shows<br>cervical<br>abnorm                               | No | Yes         | NR | (43) |

|                                         |    |      |     |   |   |   |    |                                      |                              |                                 |                  |    |                                                                                 |              |                                                              |             |             |      |      |
|-----------------------------------------|----|------|-----|---|---|---|----|--------------------------------------|------------------------------|---------------------------------|------------------|----|---------------------------------------------------------------------------------|--------------|--------------------------------------------------------------|-------------|-------------|------|------|
|                                         |    |      |     |   |   |   |    |                                      |                              |                                 |                  |    |                                                                                 |              | ality.                                                       |             |             |      |      |
| Fonti<br>nele<br><i>et al</i> ,<br>2019 | 57 | NR   | ILC | + | + | - | +  | NT +<br>Surge<br>ry +<br>RT +<br>TAM | 39                           | AVB                             | Sclerosi<br>s    | NR | +                                                                               | HR(+)<br>ILC | Pelvic<br>CT<br>shows<br>no<br>cervical<br>abnorm<br>ality.  | Surge<br>ry | F<br>G<br>T | 0.5+ | (44) |
| Abda<br>llah<br><i>et al</i> ,<br>2020  | 59 | Post | ILC | + | + | - | +  | CT +<br>ET                           | Gyn<br>sympt<br>oms<br>first | Abdom<br>inal<br>discom<br>fort | Cervical<br>mass | No | No                                                                              | HR(+)        | No                                                           | No          | Y<br>es     | NR   | (45) |
| Coch<br>rane<br><i>et al</i> ,<br>2020  | 62 | Post | IDC | + | + | - | NR | Surge<br>ry +<br>CT +<br>ET          | 120                          | AVB<br>AVD                      | No               | NR | -<br>Subse<br>quent<br>surger<br>y<br>confir<br>med<br>metast<br>atic<br>carcin | HR(+)        | Pelvic<br>MRI<br>shows<br>no<br>cervical<br>abnorm<br>ality. | Surge<br>ry | N<br>o      | NR   | (46) |

|                                          |    |      |                |                            |                            |            |    |                                                                 |                       |     |    |    |     |       |                                                             |             |             |                                                 |      |
|------------------------------------------|----|------|----------------|----------------------------|----------------------------|------------|----|-----------------------------------------------------------------|-----------------------|-----|----|----|-----|-------|-------------------------------------------------------------|-------------|-------------|-------------------------------------------------|------|
|                                          |    |      |                |                            |                            |            |    |                                                                 |                       |     |    |    | oma |       |                                                             |             |             |                                                 |      |
| Lim<br><i>et al,</i><br>2021             | 57 | NR   | L:ILC<br>R:ILC | L<br>:<br>+<br>R<br>:<br>+ | L<br>:<br>+<br>R<br>:<br>+ | L:-<br>R:- | +  | L:<br>Surge<br>ry +<br>RT +<br>CT +<br>TAM<br>R:<br>Surge<br>ry | 24                    | AVB | NR | NR | NR  | HR(+) | Pelvic<br>CT<br>shows<br>no<br>cervical<br>abnorm<br>ality. | Surge<br>ry | F<br>G<br>T | NR                                              | (47) |
| Yuan<br><i>et al,</i><br>2021            | 64 | Post | ILC<br>IDC     | +                          | NR                         | NR         | NR | Surge<br>ry +<br>RT +<br>CET                                    | 216                   | No  | NR | +  | +   | HR(+) | No                                                          | No          | Y<br>es     | Aliv<br>e at<br>the<br>time<br>of<br>repo<br>rt | (48) |
| Kon<br><i>g et</i><br><i>al,</i><br>2022 | 64 | Post | ILC            | +                          | -                          | -          | +  | Surge<br>ry +<br>RT +<br>CET                                    | 29<br><br>(35/3<br>8) | No  | NR | NR | NR  | HR(+) | PET-C<br>T<br>shows<br>no<br>cervical                       | Surge<br>ry | Y<br>es     | 20                                              | (49) |

|                                           |    |      |     |        |        |     |              |                     |                              |                                        |    |    |    |      |                                                                                                                       |    |         |     |      |
|-------------------------------------------|----|------|-----|--------|--------|-----|--------------|---------------------|------------------------------|----------------------------------------|----|----|----|------|-----------------------------------------------------------------------------------------------------------------------|----|---------|-----|------|
|                                           |    |      |     |        |        |     |              |                     |                              |                                        |    |    |    |      | abnorm<br>ality.                                                                                                      |    |         |     |      |
| Nadiyaha<br>nimu<br><i>et al,</i><br>2024 | 60 | Post | NR  | N<br>R | N<br>R | NR  | NR           | No                  | Gyn<br>sympt<br>oms<br>first | Abdom<br>inal<br>discom<br>fort        | NR | NR | +  | NR   | Pelvic<br>CT<br>shows<br>no<br>cervical<br>abnorm<br>ality.<br>Pelvic<br>MRI<br>shows<br>cervical<br>abnorm<br>ality. | No | Y<br>es | 9   | (50) |
| Wan<br>g and<br>Wei,<br>2024              | 68 | Post | IDC | N<br>R | N<br>R | +   | +(11/1<br>5) | Surge<br>ry +<br>CT | 36                           | AVB<br>Abdom<br>inal<br>discom<br>fort | NR | NR | +  | TNBC | Pelvic<br>MRI<br>shows<br>cervical<br>abnorm<br>ality.                                                                | No | Y<br>es | 18+ | (1)  |
| Boud                                      | 38 | Pre  | IDC | L      | L      | L:+ | L:+          | NT +                | 15                           | AVB                                    | NR | NR | NR | NR   | Pelvic                                                                                                                | No | Y       | 2   | (51) |

|                                           |    |      |            |   |   |           |                           |                                      |          |            |                  |    |   |              |                                                                 |                     |             |     |      |
|-------------------------------------------|----|------|------------|---|---|-----------|---------------------------|--------------------------------------|----------|------------|------------------|----|---|--------------|-----------------------------------------------------------------|---------------------|-------------|-----|------|
| agh<br><i>et al,</i><br>2024              |    |      |            | : | : | R:+       | R:+                       | RT +                                 |          | Anemi<br>a |                  |    |   |              | CT<br><br>shows<br><br>cervical<br><br>abnorm<br><br>ality.     |                     | es          |     |      |
| Zhan<br><i>g et</i><br><i>al,</i><br>2024 | 64 | Post | IDC        | R | R | R:-<br>L+ | R:-<br>L:+<br>(35/3<br>5) | Surge<br>ry +<br>RT +<br>ET +<br>CT  | 53<br>21 | AVD        | Cervical<br>mass | NR | + | HR(+)        | NR                                                              | RT                  | Y<br>es     | 4   | (6)  |
| Fara<br><i>z et</i><br><i>al,</i><br>2024 | 65 | Post | ILC        | + | + | -         | -                         | Surge<br>ry +<br>RT +<br>CT +<br>TAM | 24       | AVB        | NR               | NR | + | HR(+)        | No                                                              | Surge<br>ry +<br>RT | F<br>G<br>T | 30+ | (52) |
| Shan<br><i>et al,</i><br>2025             | 40 | NR   | ILC<br>IDC | + | + | -         | +<br>(10/1<br>0)          | Surge<br>ry +<br>RT +<br>CT +<br>ET  | 83       | No         | NR               | +  | + | ILC<br>HR(+) | PET-C<br>T<br>shows<br><br>cervical<br><br>abnorm<br><br>ality. | Surge<br>ry         | Y<br>es     | 35+ | (53) |

|                                |    |      |     |   |   |   |   |                             |     |     |                  |   |   |              |                                             |    |     |     |     |
|--------------------------------|----|------|-----|---|---|---|---|-----------------------------|-----|-----|------------------|---|---|--------------|---------------------------------------------|----|-----|-----|-----|
| Pellecchia <i>et al</i> , 2026 | 60 | Post | ILC | + | + | - | + | Surge<br>ry +<br>CT +<br>ET | 120 | AVB | Cervical<br>mass | - | + | ILC<br>HR(+) | PET-CT<br>shows<br>cervical<br>abnormality. | No | Yes | 72+ | (4) |
|--------------------------------|----|------|-----|---|---|---|---|-----------------------------|-----|-----|------------------|---|---|--------------|---------------------------------------------|----|-----|-----|-----|

Pre, premenopausal; post, postmenopausal; AVB, abnormal vaginal bleeding; AVD, abnormal vaginal discharge; ; CT, chemotherapy; RT, radiotherapy; NT, neoadjuvant therapy; TAM, tamoxifen; ET, endocrine therapy; N, axillary lymph node involvement; M, presence of other sites of distant metastases, histological type, FGT; female genital tract; Gyn, gynecology; ILC, invasive lobular carcinoma; IDC, invasive ductal carcinomas; ER, estrogen receptor; PR, progesterone; TPA, tissue polypeptide antigen; CA, cancer antigen; L, left; R, right; NR, not reported; TNBC ,Triple-negative breast cancer; Lymph node metastasis (A/B) , A out of B lymph nodes were found to have breast cancer metastasis; Treatment(P), Treatment of the primary site; Treatment(M), Treatment of metastatic sites.
